# Supplementary material for: Insights into the synergistic catalytic mechanism on the customized dual sites of an efficient ORR catalyst
Source: Royal Society of Chemistry journal article supplement (doi:10.1039/d3cy01066j), 2023-01-01
Supplement: d3cy01066j1.pdf [file d3cy01066j1.pdf]

## Support information

### Insights into the synergistic catalytic mechanism on the customized dual sites of an efficient ORR catalyst

Jinyu Zhao <sup>a</sup>, Xu Chen <sup>a</sup>, Jie Lian <sup>a</sup>, Yu Gao <sup>a</sup>, Yixing Zhang <sup>a</sup>, Xiaomin Wang

<sup>a\*</sup>

<sup>a</sup> *College of Materials Science and Engineering, Taiyuan University of Technology,  
Taiyuan 030024, China;*

*E-mail address: wangxiaomin@tyut.edu.cn (X.Wang)*

#### **In-situ electrochemical Raman tests are as following:**

Integrating a custom cell for electrochemical test with Raman spectra to perform in situ tests, further collecting the intermediates signals on the surface of catalysts during ORR. The custom cell was a three-electrode system, and with CHI 760E for collecting electrochemical data. The glassy carbon electrode, with 4 times the area of the rotating ring disc electrode (RRDE), was the working electrode. This required that the catalyst ink be coated four times as much as for the ex-situ tests, thus ensuring that the in-situ Raman signals were captured. The Ag/AgCl (in saturated KCl), and Pt wire were reference and counter electrodes, respectively. The Raman light source with  $\lambda = 532$  passed vertically through the window (quartz sheet) into the reaction cell to probe the sample surface. The acquisition time of the laser was 40 s, with the acquisition range of 0-2000  $\text{cm}^{-1}$ . Each Raman spectrum was acquired at a constant voltage

in the range of 1.05 V-0.15 V at 0.1 V intervals, while in-situ cyclic voltammetry (CV) test was performed in 0.5 M H<sub>2</sub>SO<sub>4</sub> (O<sub>2</sub>-saturated) at a very slow scan rate.

**All electrochemistry-related calculation equations are listed below :**

The electrochemical surface area (ECSA<sub>H<sub>upd</sub></sub>) of the catalyst based on the hydrogen underpotential deposition (H<sub>upd</sub>) peak is via **Eq. S1**,<sup>1</sup> as follow:

$$ECSA_{(H_{upd})} (m^2 g^{-1}) = \frac{S}{m_{Pt} \times 2.1(C m^{-2}) \frac{S}{V}}$$

Where S is the H<sub>upd</sub> integrated area from the CV curve. V is the scanning rate of 50 mV s<sup>-1</sup>. m<sub>Pt</sub> is the actual Pt mass loadings on the WE. 2.1 is the number of charges adsorbed by Pt/unit area.

The kinetic current density (J<sub>K</sub>) of the catalyst and the corresponding electron transfer number (n) are obtained through **Eq. S2** (namely, Koutecky-Levich, K-L),<sup>2,3</sup> as follow:

$$\frac{1}{J} = \frac{1}{J_L} + \frac{1}{J_K} = \frac{1}{\frac{B}{\omega^{1/2}}} + \frac{1}{J_K}$$

$$B = 0.2nFC_0D_0^{2/3} \nu^{-1/6}$$

$$J_K = nFkC_0$$

Where J, J<sub>K</sub>, and J<sub>L</sub> are the measured, kinetic, and limiting current densities, respectively. ω (rad s<sup>-1</sup>) is the angular velocity. n is electron transfer number. F is the Faraday constant (96 485 C mol<sup>-1</sup>). C<sub>0</sub> is the O<sub>2</sub> concentration (0.5 M H<sub>2</sub>SO<sub>4</sub>) and D<sub>0</sub> is the diffusion coefficient. ν is the electrolyte kinetic viscosity. k is the constant of electron transfer rate.

The mass activity (MA) and specific activity (SA) of the catalyst are calculated by the following **Eq. S3** and **Eq. S4**<sup>4,5</sup>:

$$MA = \frac{J_K}{m_{Pt}}$$

$$SA = \frac{J_K}{ECSA \times m_{Pt}}$$

Where  $J_K$  is kinetic current density,  $m_{Pt}$  is the actual Pt mass loadings on the WE. ECSA is the electrochemical surface area.

The electron transfer number ( $n_{RRDE}$ ) from RRDE electrode and the  $H_2O_2$  yield derive from the following **Eq. S5** and **Eq. S6**<sup>6,7</sup>:

$$n_{RRDE} = \frac{4I_d}{I_d + \frac{I_r}{N}}$$

$$H_2O_2(\%) = 200 \times \frac{\frac{I_r}{N}}{\frac{I_r}{N} + I_d}$$

Where  $I_d$  and  $I_r$  are the disk and ring currents, respectively. N is the current collection efficiency of 0.37 from Pt ring.

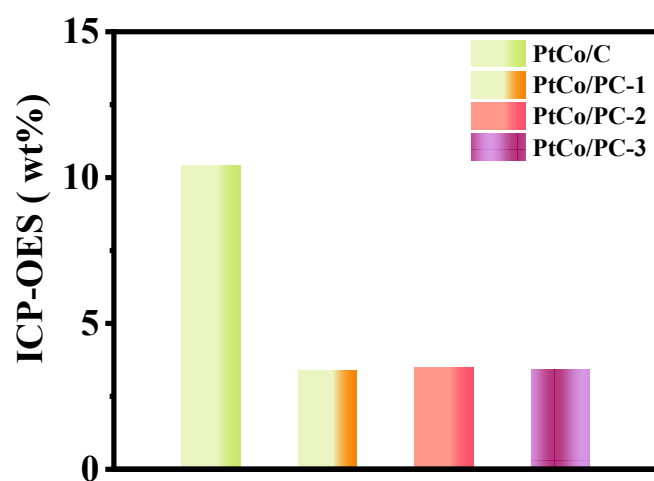

**Figure S1.** ICP statistical graph of PtCo/C, PtCo/PC-1, PtCo/PC-2, PtCo/PC-3.

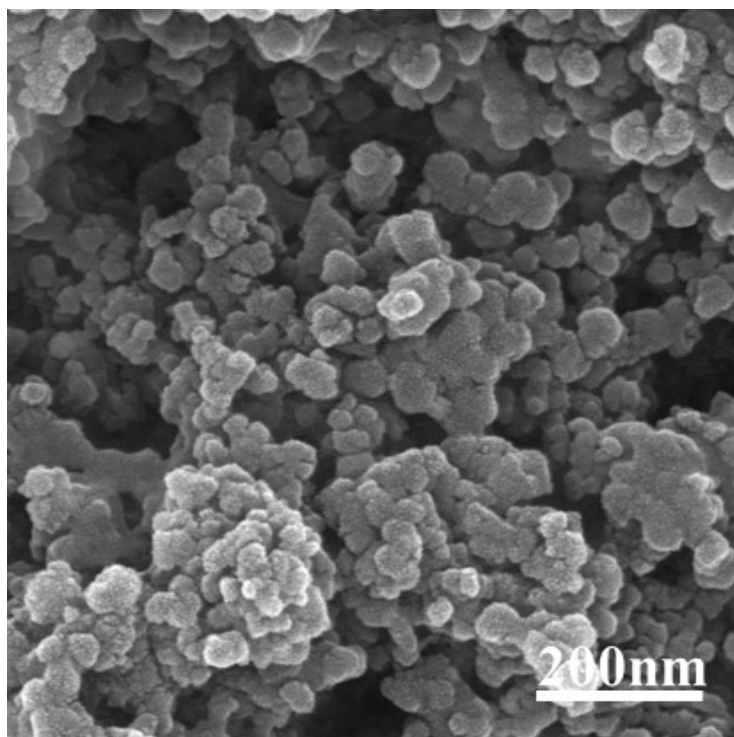

**Figure S2.** SEM image of PtCo/PC-2.

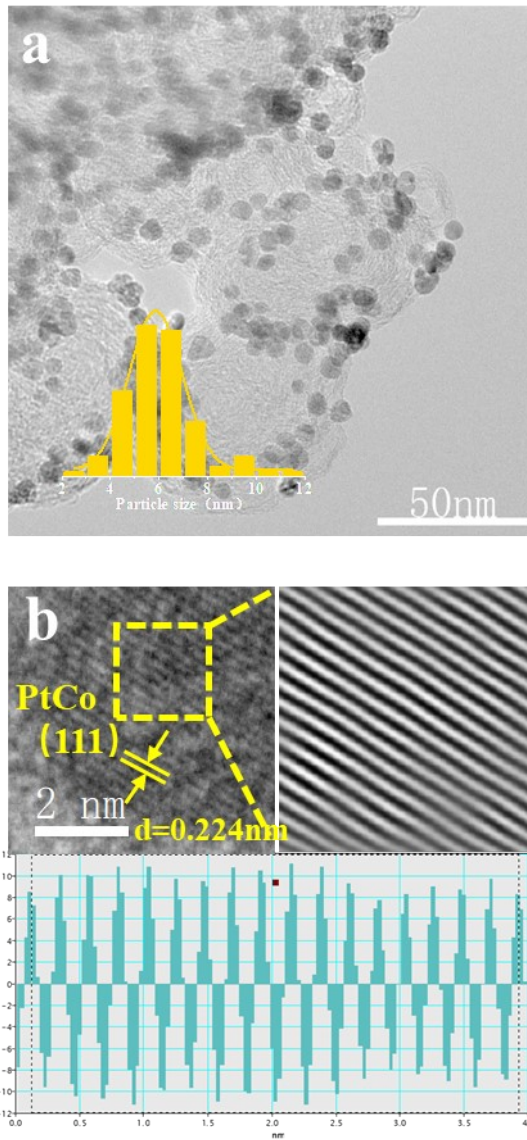

**Figure S3.** (a) The TEM image with particle size statistical histogram, (b) the HRTEM images with IFFT images and selected stripes histograms, all for PtCo/C.

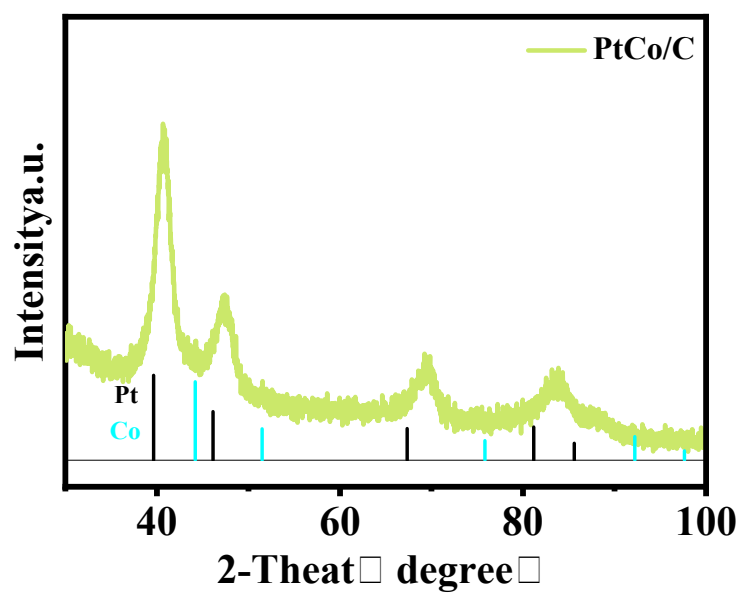

Figure S4. The XRD patterns of PtCo/C.

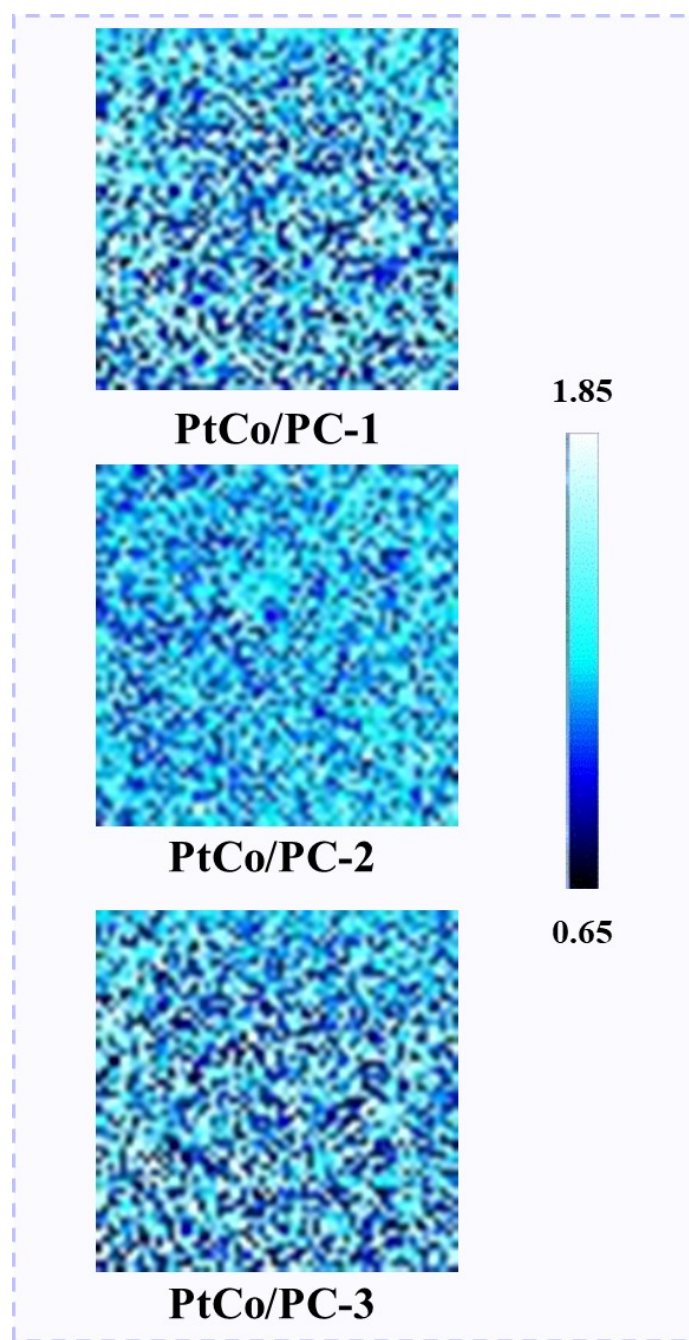

**Figure S5.** The Raman mapping map of  $I_D/I_G$  in the  $60 \times 60 \text{ um}^2$  region for PtCo/PC-1,

PtCo/PC-2, PtCo/PC-3.



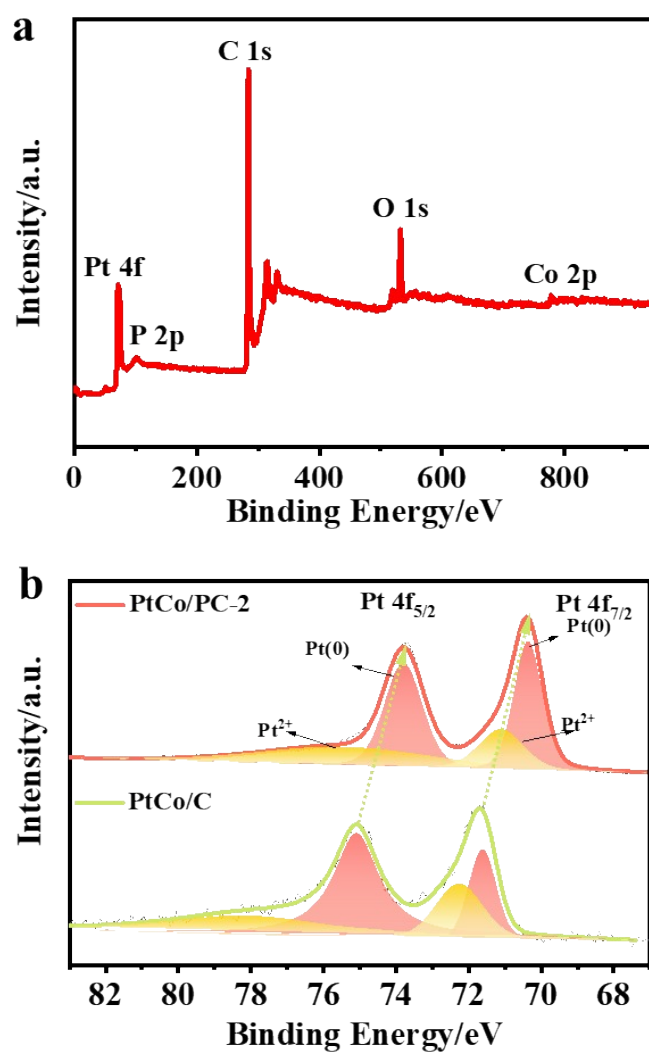

**Figure S6.** (a) The XPS survey scan of PtCo/PC-2. (b) The high resolution XPS spectra of Pt 4f for PtCo/C and PtCo/PC-2.

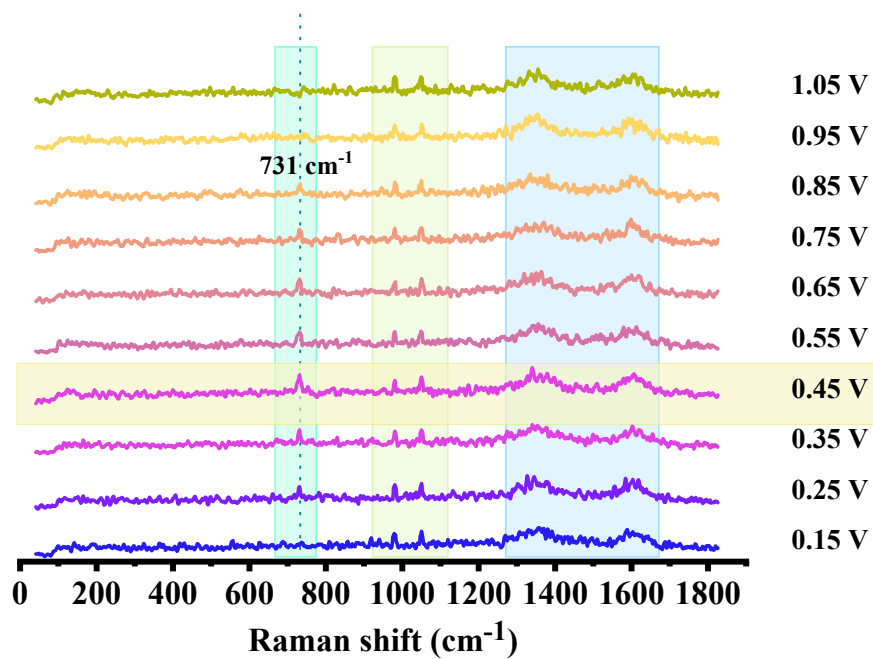

**Figure S7.** In-situ Raman spectra of intermediates on the surfaces for PtCo/C in O<sub>2</sub>-saturated 0.5M H<sub>2</sub>SO<sub>4</sub> (ORR) at different constant potentials.

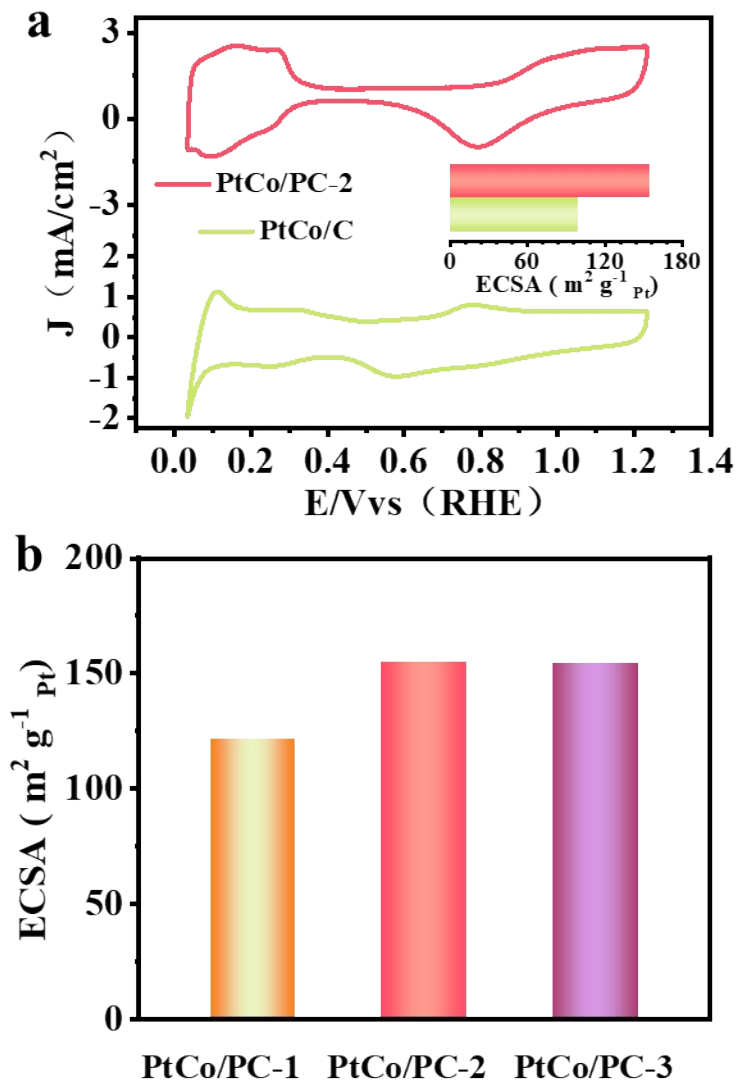

**Figure S8.** (a) CV curves of PtCo/PC-2 and PtCo/C, with the statistical histograms of ECSA<sub>Hupd</sub>. (b) The statistical histograms of ECSA<sub>Hupd</sub> for PtCo/PC-1, PtCo/PC-2, PtCo/PC-3, all in O<sub>2</sub>-saturated 0.5M H<sub>2</sub>SO<sub>4</sub> (ORR).

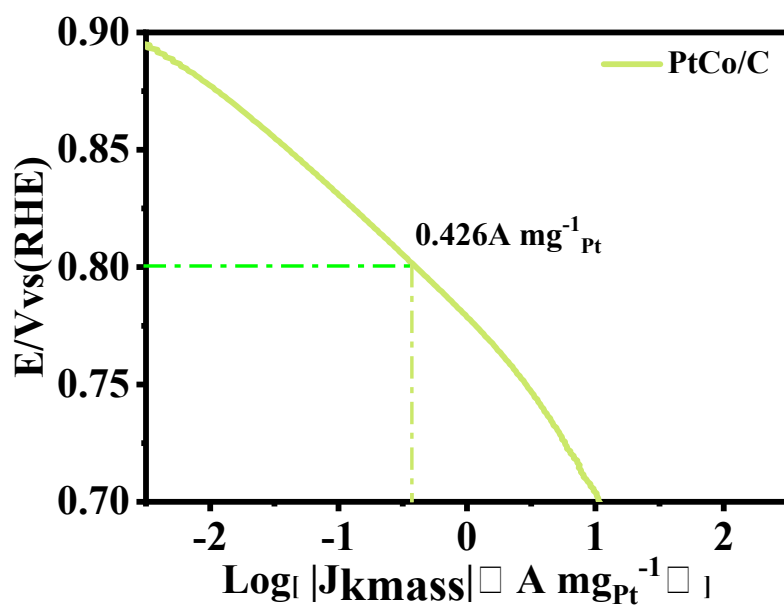

**Figure S9.** (a) MA curve of PtCo/C in  $\text{O}_2$ -saturated 0.5 M  $\text{H}_2\text{SO}_4$  (ORR).

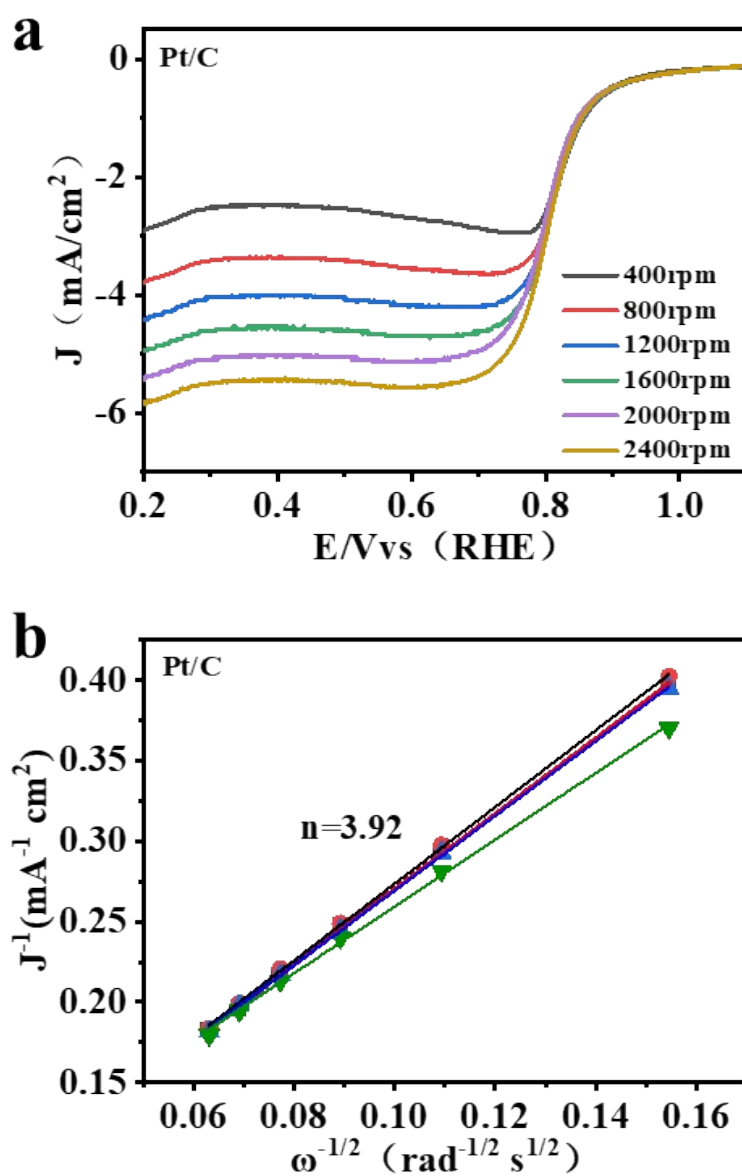

**Figure S10.** (a) LSV curves at different speeds of Pt/C, and (b) the corresponding K-L curves, all in O<sub>2</sub>-saturated 0.5 M H<sub>2</sub>SO<sub>4</sub> (ORR).

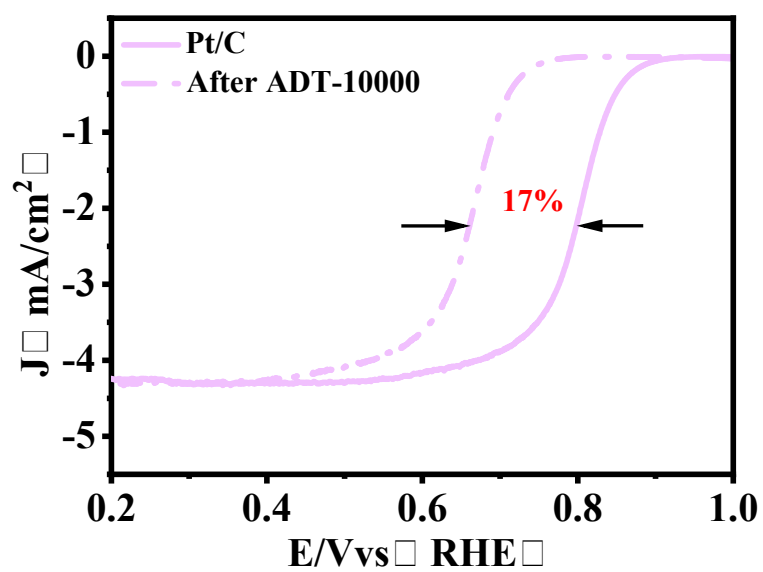

**Figure S11.** LSV curves of Pt/C at 1600 rpm before and after 10000s ADT in O<sub>2</sub>-saturated 0.5 M H<sub>2</sub>SO<sub>4</sub> (ORR).

## 【Reference】

1. W. Yun-Feng, M. Ji-Wei and H. Yun-Hui, *Rare Metals*, 2022, DOI: 10.1007/s12598-022-02119-6.
2. L. Yifei, P. Lishan, W. Chaoling, Y. Yigang, X. Haijiao, C. Yungui and W. Yao, *Nano Research*, 2023, DOI: 10.1007/s12274-023-5399-2.
3. J. Cao, H. Cao, F. Wang and H. Zhu, *Journal of Power Sources*, 2021, **489**.
4. S. He, Y. Liu, H. Zhan and L. Guan, *ACS Catalysis*, 2021, **11**, 9355-9365.
5. X. Li, J. Xi, L. Tang, H. Wang, Y. Liu, C. Min, S. Gao, F. Liu and X. Yang, *Electrochimica Acta*, 2023, **462**.
6. C. Zhang, Y. Dai, H. Chen, Y. Ma, B. Jing, Z. Cai, Y. Duan, B. Tang and J. Zou, *Journal of Materials Chemistry A*, 2018, DOI: 10.1039/c8ta08285e.
7. Y. Wu, Y. Zhao, J. Liu and F. Wang, *Journal of Materials Chemistry A*, 2018, DOI: 10.1039/c8ta00029h.
